Correction

## Correction: Pre-clinical validation of B cell maturation antigen (BCMA) as a target for T cell immunotherapy of multiple myeloma

De-Xiu Bu<sup>1,\*</sup>, Reshma Singh<sup>1,\*</sup>, Eugene E. Choi<sup>1,\*</sup>, Marco Ruella<sup>3</sup>, Selene Nunez-Cruz<sup>3</sup>, Keith G. Mansfield<sup>1</sup>, Paul Bennett<sup>1</sup>, Nathaniel Barton<sup>1</sup>, Qilong Wu<sup>2</sup>, Jiquan Zhang<sup>2</sup>, Yongqiang Wang<sup>2</sup>, Lai Wei<sup>2</sup>, Shawn Cogan<sup>1</sup>, Tucker Ezell<sup>1</sup>, Shree Joshi<sup>1</sup>, Kellie J. Latimer<sup>1</sup>, Brian Granda<sup>1</sup>, William R. Tschantz<sup>1</sup>, Regina M. Young<sup>3</sup>, Heather A. Huet<sup>1</sup>, Celeste J. Richardson<sup>1</sup> and Michael C. Milone<sup>3,4</sup>

<sup>1</sup>Novartis Institutes for Biomedical Research, Cambridge, MA 02139, USA

<sup>2</sup>China Novartis Institutes for Biomedical Research, Shanghai 201203, China

<sup>3</sup>Center for Cellular Immunotherapies, Perelman School of Medicine at the University of Pennsylvania, Philadelphia, PA 19104, USA

<sup>4</sup>Department of Pathology and Laboratory Medicine, Perelman School of Medicine at the University of Pennsylvania, Philadelphia, PA 19104, USA

\*These authors have contributed equally to this work

### Published:

**Copyright:** © 2021 Bu et al. This is an open access article distributed under the terms of the [Creative Commons Attribution License](#) (CC BY 3.0), which permits unrestricted use, distribution, and reproduction in any medium, provided the original author and source are credited.

**This article has been corrected:** Additional information for Supplementary Table 1 was accidentally omitted from the published article. The additions to Table 1 now appear below. The authors declare that these corrections do not change the results or conclusions of this paper.

Original article: Oncotarget. 2018; 9:25764–25780. <https://doi.org/10.18632/oncotarget.25359>

**Supplementary Table 1: List of the antibodies used for multiparametric flow cytometry**

| Specificity   | Fluorochrome | Clone    | Vendor      | cat #      |
|---------------|--------------|----------|-------------|------------|
| CD14          | V500         | M5E2     | BD Horizon  | 561391     |
| CD19          | PE-Cy7       | SJ25C1   | eBioscience | 25-0198-42 |
| CD3           | PE           | OKT3     | eBioscience | 12-0037-42 |
| CD45          | BV421        | HI30     | Biologend   | 304032     |
| CD8           | PE-Cy7       | RPA-T8   | eBioscience | 25-0088-42 |
| CD38          | APCeF780     | HIT2     | eBioscience | 47-0389-42 |
| BCMA          | PE           |          | R&D Systems | FAB193P    |
| BCMA          | PE           | 19F2     | Biologend   | 357504     |
| CD56          | BV605        | HCD56    | Biologend   | 318333     |
| Kappa Light C | FITC         | TB28-2   | eBioscience | 11-9970-42 |
| LambdaLight C | PerCPef710   | 1.155.2  | eBioscience | 46-9990-42 |
| CD34          | APC          | 581      | Biologend   | 343510     |
| CD45-RA       | APC-Cy7      | HI100    | eBioscience | 47-0458-42 |
| Lineage       | FITC         |          | eBioscience | 22-7778-72 |
| CD90          | PerCPCy5.5   | eBio5E10 | eBioscience | 45-0909-41 |
| CD10          | BV421        | HI10a    | Biologend   | 312218     |
| CD38          | PECY7        | HIT2     | eBioscience | 25-0389-42 |

Multiparametric flow cytometry. Anti-human –mouse antibodies were purchased from multiple vendors (listed in Supplementary Table 1). Cells were washed once in PBS (Gibco, Life Technologies, 14190-136), supplemented with 2% fetal bovine serum (Gemini, 100-106, West Sacramento, CA, USA) and stained for 15 minutes at room temperature. For intracellular staining the Fix&Perm Invitrogen Kit was used according to standard protocol. In all analyses, the population of interest was gated based on forward vs. side scatter characteristics followed by singlet gating, and live cells were gated using Live Dead Fixable Aqua (Invitrogen, LifeTechnologies, L34957). Time gating was included for quality control. Flow cytometry was performed on a four-laser Fortessa-LSR II cytometer or Accuri C6 (Becton-Dickinson, San Jose, CA, USA) and analyzed with FlowJo X 10.0.7r2 (Tree Star, Ashland OR, USA).
